# Supplementary material for: Mortality Reduction in EMPA-REG OUTCOME Trial: Beyond the Antidiabetes Effect
Source: Oxford University Press journal article supplement (doi:10.2337/dc17-1059), 2018-01-12
Supplement: dc171059supplementarydata.pdf [file dc171059supplementarydata.pdf]

SUPPLEMENTARY DATA

**Supplementary Table S1.** Simulation to compute the expected rate difference of all-cause death from the LEADER, SUSTAIN-6, EMPA-REG and CANVAS trials of medications to treat type 2 diabetes, expected from the impact of the drugs on the HbA1c reduction in the trials

| Trial     | Study drug    | Sample size | Median follow-up (years) | Mean reduction in HbA1c (%) | Rate difference of all-cause mortality per 1000 PYs |                               |          |
|-----------|---------------|-------------|--------------------------|-----------------------------|-----------------------------------------------------|-------------------------------|----------|
|           |               |             |                          |                             | Observed                                            | Expected from HbA1c reduction | Residual |
| LEADER    | Liraglutide   | 9,340       | 3.8                      | 0.40                        | -3.7                                                | -1.5                          | -2.2     |
| SUSTAIN-6 | Semaglutide   | 3,297       | 2.1                      | 0.85                        | +0.6                                                | -2.1                          | +2.7     |
| EMPA-REG  | Empagliflozin | 7,020       | 3.1                      | 0.45                        | -9.2                                                | -1.9                          | -7.3     |
| CANVAS    | Canagliflozin | 10,142      | 2.4                      | 0.58                        | -2.2                                                | -1.6                          | -0.6     |
